# Supplementary material for: Effectiveness of an eHealth self-management tool for older adults with multimorbidity (KeepWell): protocol for a hybrid effectiveness–implementation randomised controlled trial
Source: PubMed Central journal article supplement — BMJ Open. 2021 Feb 17;11(2):e048350. doi: 10.1136/bmjopen-2020-048350 (PMC7893667; doi:10.1136/bmjopen-2020-048350), 2021-02-17
Supplement: bmjopen-2020-048350.reviewer_comments.pdf [file bmjopen-2020-048350.reviewer_comments.pdf]

## PEER REVIEW HISTORY

BMJ Open publishes all reviews undertaken for accepted manuscripts. Reviewers are asked to complete a checklist review form (<http://bmjopen.bmj.com/site/about/resources/checklist.pdf>) and are provided with free text boxes to elaborate on their assessment. These free text comments are reproduced below.

## ARTICLE DETAILS

|                            |                                                                                                                                                                                                                                                                                                                                                                                                                                                                                                   |
|----------------------------|---------------------------------------------------------------------------------------------------------------------------------------------------------------------------------------------------------------------------------------------------------------------------------------------------------------------------------------------------------------------------------------------------------------------------------------------------------------------------------------------------|
| <b>TITLE (PROVISIONAL)</b> | Effectiveness of an eHealth self-management tool for older adults with multimorbidity (KeepWell): Protocol for a hybrid effectiveness-implementation randomized controlled trial                                                                                                                                                                                                                                                                                                                  |
| <b>AUTHORS</b>             | Kastner, Monika; Makarski, Julie; Hayden, Leigh; Hamid, Jemila S.; Holroyd-Leduc, Jayna; Twohig, Margo; Macfarlane, Charlie; Hynes, Mary; Prasaud, Leela; Sklar, Barb; Honsberger, Joan; Wang, Marilyn; Kramer, Gloria; Hobden, Gerry; Armson, Heather; Ivers, N; Leung, Fok-Han; Liu, Barbara; Marr, Sharon; Greiver, Michelle; Desroches, Sophie; Sibley, Kathryn; Saunders, Hailey; Isaranuwachai, Wannudee; McArthur, Eric; Harvey, Sarah; Manawadu, Kithara; Petricca, Kadia; Straus, Sharon |

This article was not externally reviewed at BMJ Open. Protocols that have been independently assessed prior to submission to BMJ Open are usually fast-tracked to publication on the grounds that further substantial changes will not be possible. This independent assessment will usually be external, independent review for both a substantial grant award from a non-commercial or government funder and ethics approval.
